# Supplementary material for: A Turn-On Quinazolinone-Based Fluorescence Probe for Selective Detection of Carbon Monoxide
Source: MDPI journal article supplement (doi:10.3390/molecules28093654), 2023-04-22
Supplement: s1 [file s1]

## Supplementary Materials

### A Turn-On Quinazolinone-Based Fluorescence Probe for Selective Detection of Carbon Monoxide

Table S1. The websites of the supporting companies for the used chemicals in the study

| Company                                   | Website                                                                               |
|-------------------------------------------|---------------------------------------------------------------------------------------|
| Yamato Scientific Co., Ltd., Tokyo, Japan | <a href="https://www.yamato-scientific.com/">https://www.yamato-scientific.com/</a>   |
| Wako Pure Chemicals (Osaka, Japan)        | <a href="http://www.wako-chem.co.jp/english/">http://www.wako-chem.co.jp/english/</a> |
| Sigma-Aldrich (St. Louis, USA)            | <a href="https://www.sigmaaldrich.com/JP/en">https://www.sigmaaldrich.com/JP/en</a>   |
| Nacalai (Kyoto, Japan)                    | <a href="https://www.nacalai.co.jp/global/">https://www.nacalai.co.jp/global/</a>     |
| Tokyo Chemical Industries (Tokyo)         | <a href="https://www.tcichemicals.com/JP/en/">https://www.tcichemicals.com/JP/en/</a> |
| Dojindo (Kumamoto, Japan).                | <a href="https://www.dojindo.com/ASIA/">https://www.dojindo.com/ASIA/</a>             |

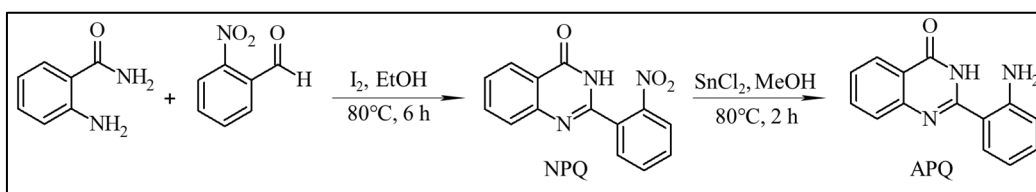

**Figure S1.** Synthesis of NPQ and APQ.

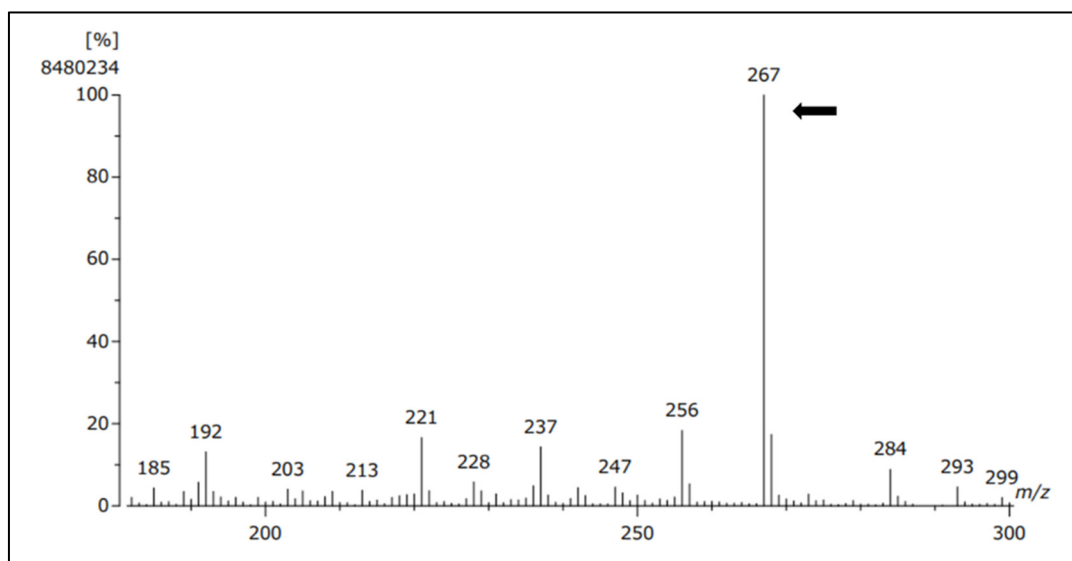

**Figure S2.** EI-MS spectrum of NPQ.

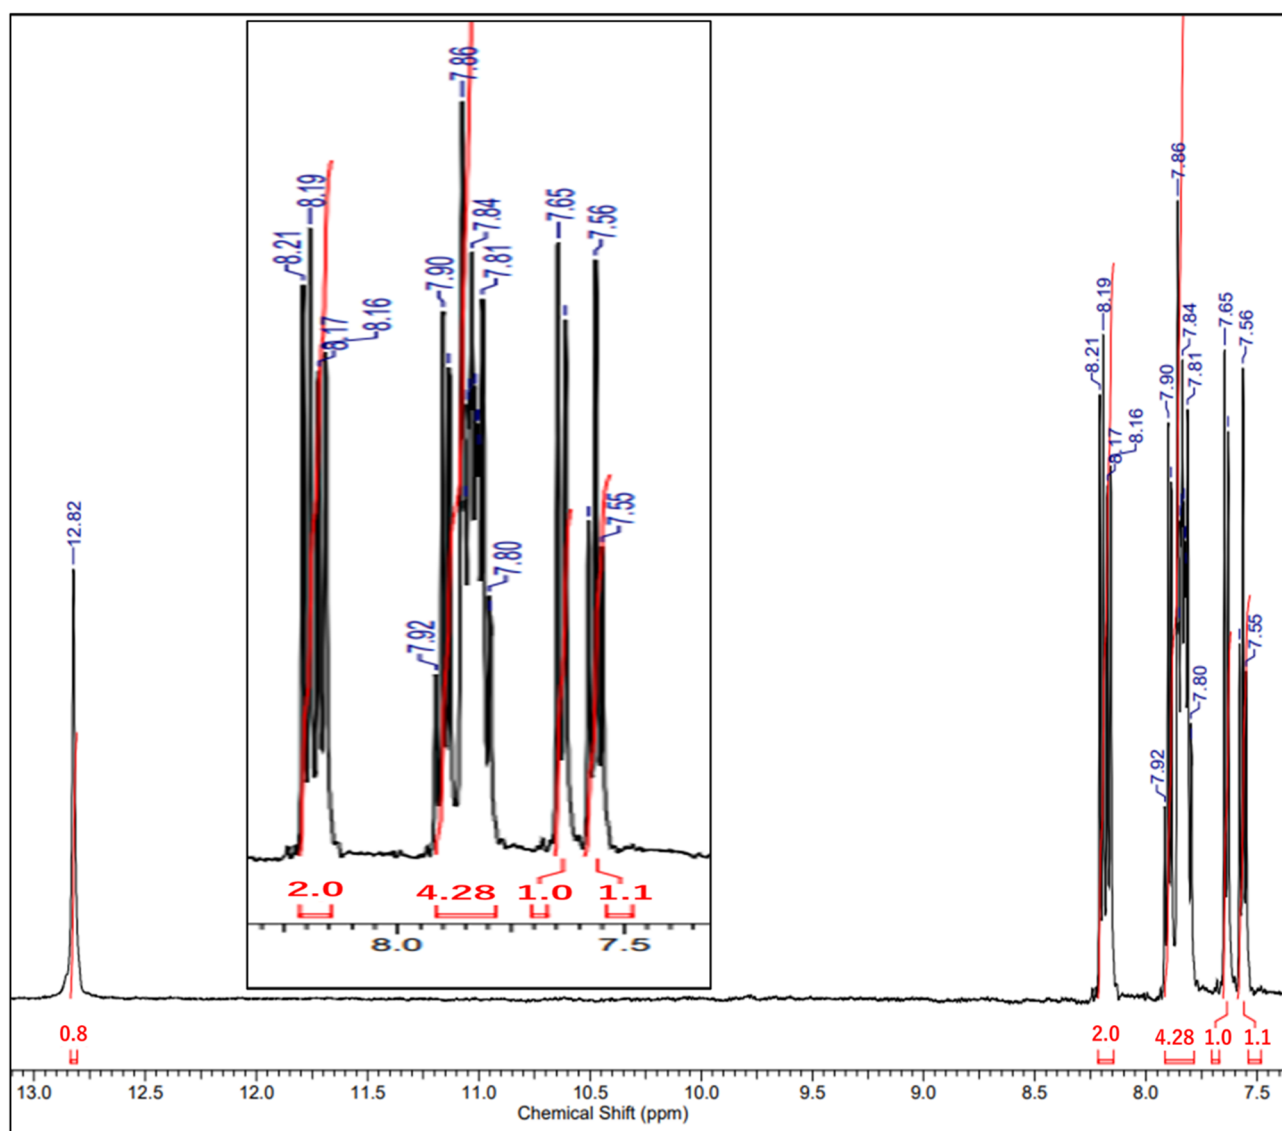

**Figure S3.**  $^1\text{H}$  NMR spectrum of NPQ with enlargement at the interest area between 7 and 8.5 ppm as an inset.

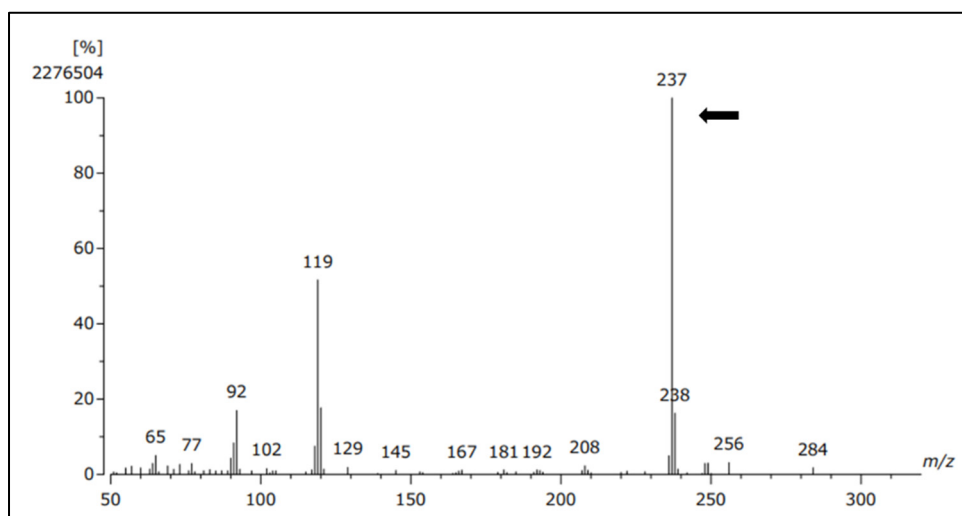

Figure S4. EI-MS spectrum of APQ.

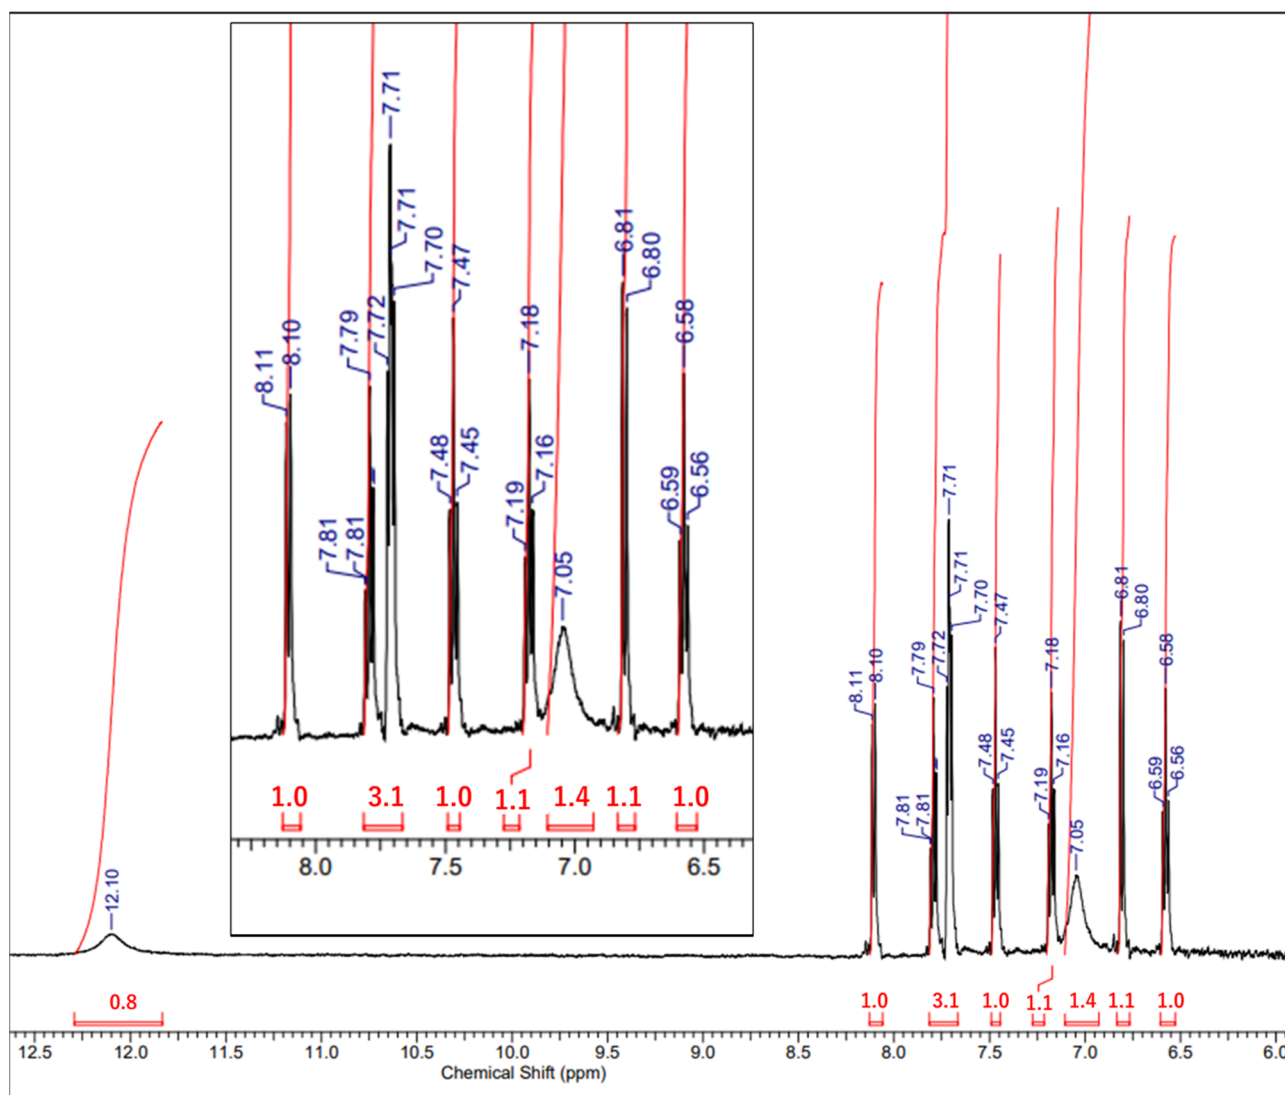

Figure S5.  $^1\text{H}$  NMR spectrum of APQ with enlargement at the interest area between 6.5 and 8.5 ppm as an inset.
